# Supplementary material for: Dynamic heterogeneity in aqueous ionic solutions
Source: Royal Society of Chemistry journal article supplement (doi:10.1039/c8cp02787k), 2018-01-01
Supplement: c8cp02787k1.pdf [file c8cp02787k1.pdf]

## Supplementary Information

### Dynamic heterogeneity in aqueous ionic solution

Gan Ren, Lin Chen and Yanting Wang\*

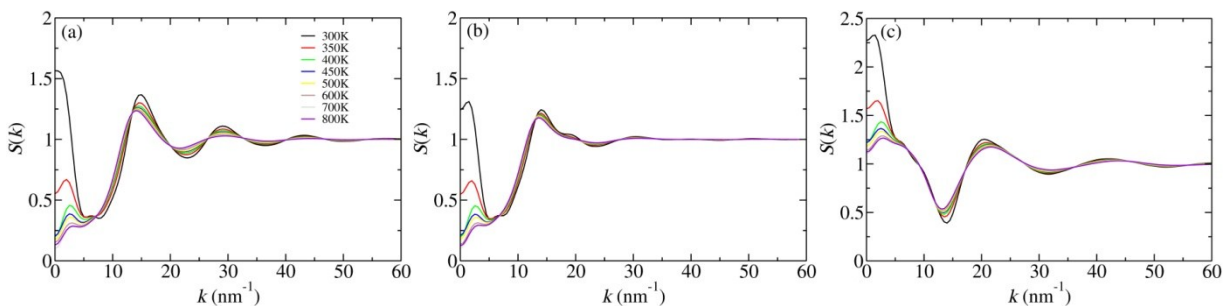

**Fig. S1** Ion-ion static structure factors: (a)  $\text{K}^+\text{-K}^+$ , (b)  $\text{SCN}^-\text{-SCN}^-$ , and (c)  $\text{K}^+\text{-SCN}^-$ .

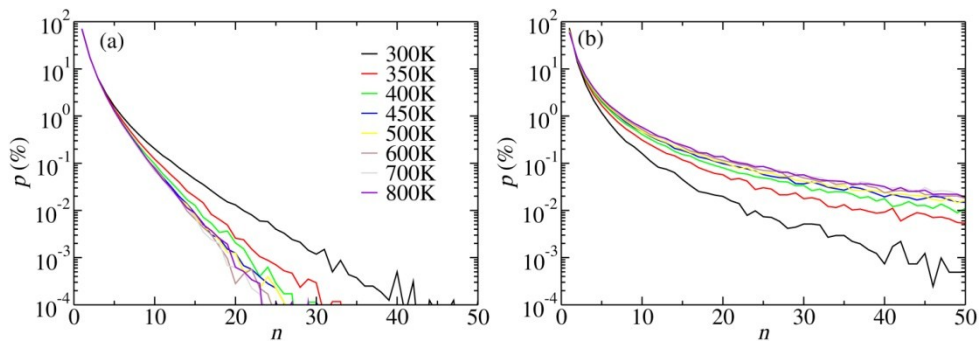

**Fig. S2** Ion cluster size distributions consisted of  $\text{K}^+$  (a) and  $\text{SCN}^-$  (b).

**Table S1** Ion cluster size distributions consisted of  $K^+$ . The first row is temperature and the first column is cluster size.

| <i>n</i> | 300 K  | 350 K  | 400 K  | 450 K  | 500 K  | 600 K  | 700 K  | 800 K  |
|----------|--------|--------|--------|--------|--------|--------|--------|--------|
| 1        | 69.27% | 70.57% | 71.23% | 71.58% | 71.64% | 71.42% | 71.18% | 70.82% |
| 2        | 16.80% | 16.99% | 17.01% | 17.05% | 17.08% | 17.20% | 17.32% | 17.42% |
| 3        | 6.24%  | 6.12%  | 6.03%  | 5.93%  | 5.94%  | 6.04%  | 6.09%  | 6.18%  |
| 4        | 2.98%  | 2.76%  | 2.64%  | 2.58%  | 2.53%  | 2.58%  | 2.61%  | 2.68%  |
| 5        | 1.62%  | 1.41%  | 1.31%  | 1.27%  | 1.25%  | 1.24%  | 1.26%  | 1.29%  |
| 6        | 0.97%  | 0.81%  | 0.71%  | 0.66%  | 0.64%  | 0.65%  | 0.66%  | 0.68%  |
| 7        | 0.62%  | 0.48%  | 0.41%  | 0.37%  | 0.37%  | 0.36%  | 0.36%  | 0.38%  |

**Table S2** Ion cluster size distributions consisted of  $SCN^-$ .

| <i>n</i> | 300 K  | 350 K  | 400 K  | 450 K  | 500 K  | 600 K  | 700 K  | 800 K  |
|----------|--------|--------|--------|--------|--------|--------|--------|--------|
| 1        | 73.46% | 67.75% | 64.67% | 62.74% | 61.93% | 60.53% | 59.51% | 59.13% |
| 2        | 13.80% | 15.10% | 15.61% | 15.84% | 16.14% | 16.22% | 16.45% | 16.51% |
| 3        | 4.76%  | 5.74%  | 6.18%  | 6.61%  | 6.69%  | 6.85%  | 6.98%  | 7.16%  |
| 4        | 2.16%  | 2.86%  | 3.26%  | 3.48%  | 3.53%  | 3.78%  | 3.86%  | 3.93%  |
| 5        | 1.18%  | 1.68%  | 1.96%  | 2.12%  | 2.19%  | 2.37%  | 2.39%  | 2.42%  |
| 6        | 0.70%  | 1.09%  | 1.32%  | 1.42%  | 1.46%  | 1.60%  | 1.68%  | 1.66%  |
| 7        | 0.43%  | 0.74%  | 0.91%  | 1.03%  | 1.07%  | 1.14%  | 1.18%  | 1.22%  |

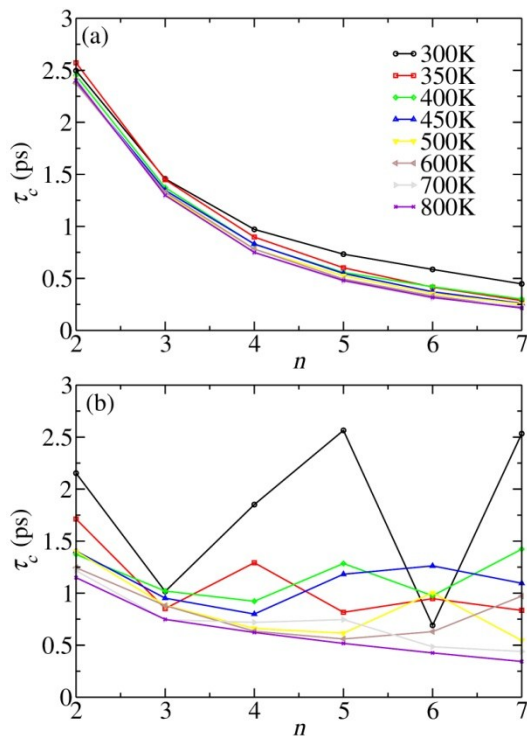

**Fig. S3** Ion cluster size versus cluster lifetime: (a)  $K^+$  and (b)  $SCN^-$ .

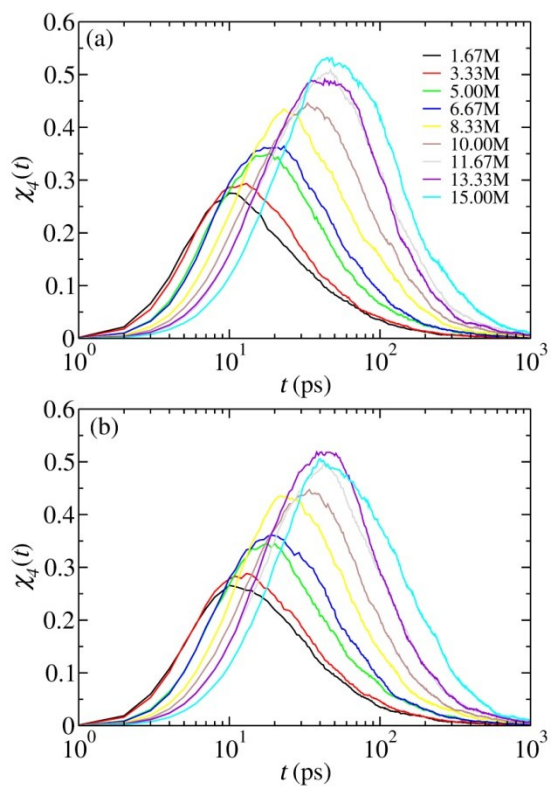

**Fig. S4** Dynamic susceptibility for ion in different concentration: (a)  $K^+$  and (b)  $SCN^-$ .

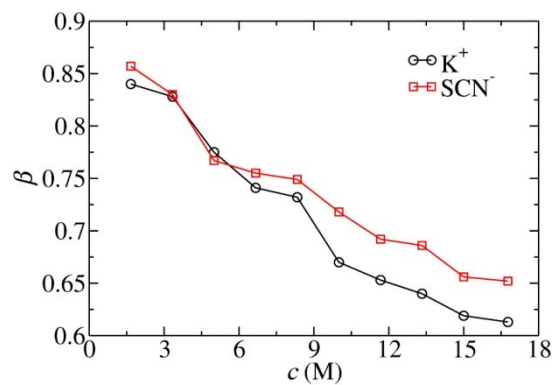

**Fig. S5** Fitted exponents  $\beta$  for the self-intermediate scattering functions at different concentrations by

$$F_s(k,t): e^{-(t/\tau)^\beta}.$$

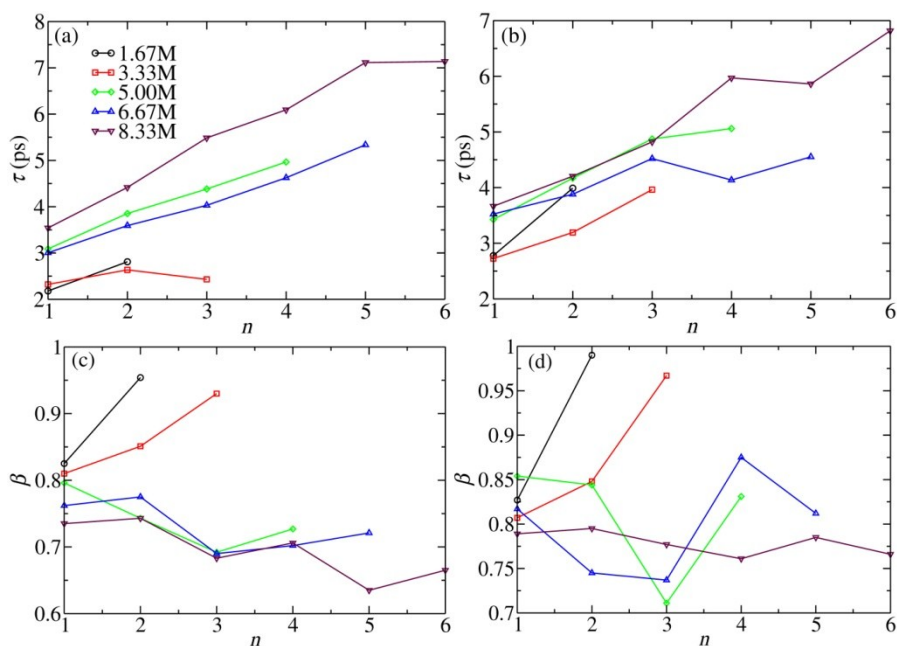

**Fig. S6** Fitted  $\tau$  and  $\beta$  of the self-van Hove functions for differently sized clusters by  $F_s(k,t): e^{-(t/\tau)^\beta}$  at different concentrations: (a) and (b) for  $K^+$ ; (c) and (d) for  $SCN^-$ .

**Table S3** Ion cluster size distributions consisted of  $K^+$ . The first row is concentration and the first column is cluster size.

| <i>n</i> | 1.67M  | 3.33M  | 5.00M  | 6.67M  | 8.33M  |
|----------|--------|--------|--------|--------|--------|
| 1        | 95.68% | 88.72% | 83.24% | 81.50% | 76.77% |
| 2        | 4.25%  | 9.83%  | 12.78% | 13.77% | 15.66% |
| 3        |        | 1.25%  | 2.84%  | 3.28%  | 4.47%  |
| 4        |        |        | 0.82%  | 0.94%  | 1.62%  |
| 5        |        |        |        | 0.34%  | 0.76%  |
| 6        |        |        |        |        | 0.36%  |

**Table S4** Ion cluster size distributions consisted of  $SCN^-$ .

| <i>n</i> | 1.67M  | 3.33M  | 5.00M  | 6.67M  | 8.33M  |
|----------|--------|--------|--------|--------|--------|
| 1        | 96.55% | 84.44% | 75.93% | 74.15% | 70.72% |
| 2        | 3.27%  | 12.16% | 13.35% | 14.64% | 14.81% |
| 3        |        | 2.57%  | 4.20%  | 4.98%  | 4.79%  |
| 4        |        |        | 2.10%  | 1.82%  | 1.89%  |
| 5        |        |        |        | 1.04%  | 1.30%  |
| 6        |        |        |        |        | 0.83%  |
